# Supplementary material
Source: ML conference proceedings conference paper supplement (https://proceedings.neurips.cc/paper_files/paper/2023/hash/6e60a9023d2c63f7f0856910129ae753-Abstract.html)
Supplement: Supplementary file 1 [file 6e60a9023d2c63f7f0856910129ae753-Supplemental-Conference.pdf]

## A Projection Lemma

**Proposition A.1.** For any PSD matrix  $A$  with dimension  $d$ , any closed convex set  $\mathcal{B}$  in the Euclidian space  $\mathbb{R}^d$ , and  $\hat{\mathbf{x}} \in \mathbb{R}^d$ , let

$$\mathbf{x}^* = \operatorname{argmin}_{\mathbf{x} \in \mathcal{B}} g(\hat{\mathbf{x}}, \mathbf{x})$$

where

$$g(\mathbf{u}, \mathbf{v}) \triangleq (\mathbf{u} - \mathbf{v})^\top A (\mathbf{u} - \mathbf{v}),$$

then

$$g(\mathbf{x}^*, \mathbf{x}_0) \leq g(\hat{\mathbf{x}}, \mathbf{x}_0) \quad \forall \mathbf{x}_0 \in \mathcal{B}.$$

More generally,

$$g(\mathbf{x}^*, \mathbf{z}_0) \leq g(\hat{\mathbf{x}}, \mathbf{z}_0) + \min_{\mathbf{x} \in \mathcal{B}} g(\mathbf{z}_0, \mathbf{x}) \quad \forall \mathbf{z}_0 \in \mathbb{R}^d.$$

*Proof.* We first provide a proof for  $\mathbf{x}_0 \in \mathcal{B}$ . For any  $\alpha \in [0, 1]$ , let

$$\mathbf{x}_\alpha \triangleq \alpha \mathbf{x}^* + (1 - \alpha) \mathbf{x}_0.$$

By convexity, we have  $\mathbf{x}_\alpha \in \mathcal{B}$  for any  $\alpha$ . Note that  $g(\hat{\mathbf{x}}, \mathbf{x}_\alpha)$  is differentiable. By the definition of  $\mathbf{x}^*$ , we have

$$(\mathbf{x}^* - \hat{\mathbf{x}})^\top A (\mathbf{x}^* - \mathbf{x}_0) = \frac{1}{2} \frac{\partial}{\partial \alpha} g(\hat{\mathbf{x}}, \mathbf{x}_\alpha) \Big|_{\alpha=1} \leq 0.$$

Therefore,

$$g(\mathbf{x}^*, \mathbf{x}_0) = g(\hat{\mathbf{x}}, \mathbf{x}_0) + 2(\mathbf{x}^* - \hat{\mathbf{x}})^\top A (\mathbf{x}^* - \mathbf{x}_0) - g(\mathbf{x}^*, \hat{\mathbf{x}}) \leq g(\hat{\mathbf{x}}, \mathbf{x}_0),$$

where the last inequality uses the PSD property of  $A$ .

Now we consider the more general case and let  $\mathbf{x}$  be any vector in  $\mathcal{B}$ . Following the same steps in the earlier case, we have

$$(\mathbf{x}^* - \hat{\mathbf{x}})^\top A (\mathbf{x}^* - \mathbf{x}) \leq 0.$$

Hence,

$$\begin{aligned} g(\mathbf{x}^*, \mathbf{z}_0) - g(\hat{\mathbf{x}}, \mathbf{z}_0) &= 2(\mathbf{x}^* - \hat{\mathbf{x}})^\top A (\mathbf{x}^* - \mathbf{z}_0) - g(\mathbf{x}^*, \hat{\mathbf{x}}) \\ &\leq 2(\mathbf{x}^* - \hat{\mathbf{x}})^\top A (\mathbf{x} - \mathbf{z}_0) - g(\mathbf{x}^*, \hat{\mathbf{x}}) \\ &= g(\mathbf{z}_0, \mathbf{x}) - (\mathbf{x} - \mathbf{z}_0 - \mathbf{x}^* + \hat{\mathbf{x}})^\top A (\mathbf{x} - \mathbf{z}_0 - \mathbf{x}^* + \hat{\mathbf{x}}) \\ &\leq g(\mathbf{z}_0, \mathbf{x}). \end{aligned}$$

Note that the above inequality holds for any  $\mathbf{x} \in \mathcal{B}$ . The proposition is proved by taking the minimum over  $\mathbf{x}$ . □

## B Proof of Proposition 3.3

*Proof.* We first prove for the case where  $\mathbf{Z}$  is deterministic. Let  $\mu_{\mathbf{Z}}$  denote the conditional expectation of  $\theta$ . By Cauchy's inequality,

$$\mathbb{E}[(\theta - \mu_{\mathbf{Z}})^2 | \mathbf{Z}] \cdot \mathbb{E} \left[ \left( \frac{\partial}{\partial \theta} \ln f_{\mathbf{Z}}(\theta) \right)^2 \Big| \mathbf{Z} \right] \geq \mathbb{E} \left[ \left| (\theta - \mu_{\mathbf{Z}}) \cdot \frac{\partial}{\partial \theta} \ln f_{\mathbf{Z}}(\theta) \right| \Big| \mathbf{Z} \right]^2. \quad (22)$$

The quantity on the RHS above can be bounded as follows.

$$\begin{aligned}
\mathbb{E} \left[ \left| (\theta - \mu_{\mathbf{Z}}) \cdot \frac{\partial}{\partial \theta} \ln f_{\mathbf{Z}}(\theta) \right| \middle| \mathbf{Z} \right] &= \int \left| (\theta - \mu_{\mathbf{Z}}) \cdot \frac{\partial}{\partial \theta} \ln f_{\mathbf{Z}}(\theta) \right| f_{\mathbf{Z}}(\theta) d\theta \\
&= \int \left| (\theta - \mu_{\mathbf{Z}}) \cdot \frac{\partial}{\partial \theta} f_{\mathbf{Z}}(\theta) \right| d\theta \\
&\geq \limsup_{T \rightarrow +\infty} \left| \int_{-T}^T (\theta - \mu_{\mathbf{Z}}) \cdot \frac{\partial}{\partial \theta} f_{\mathbf{Z}}(\theta) d\theta \right| \\
&= \limsup_{T \rightarrow +\infty} \left| \left( (\theta - \mu_{\mathbf{Z}}) f_{\mathbf{Z}}(\theta) \right) \Big|_{\theta=-T}^{\theta=T} \right| - \mathbb{P}[\theta \in [-T, T] | \mathbf{Z}] \\
&\geq 1,
\end{aligned}$$

where the last inequality uses the integrability of  $f_{\mathbf{Z}}$ , which implies

$$\liminf_{T \rightarrow +\infty} (\theta - \mu_{\mathbf{Z}}) f_{\mathbf{Z}}(\theta) \Big|_{\theta=-T}^{\theta=T} \leq 0.$$

Then we evaluate the second factor on the LHS of inequality (22). Recall that  $\frac{\partial^2}{\partial \theta^2} \ln f_{\mathbf{Z}}(\theta)$  is integrable, the following limit exists.

$$\mathbb{E} \left[ \frac{\partial^2}{\partial \theta^2} \ln f_{\mathbf{Z}}(\theta) \middle| \mathbf{Z} \right] = \lim_{T \rightarrow +\infty} \int_{-T}^T f_{\mathbf{Z}}(\theta) \frac{\partial^2}{\partial \theta^2} \ln f_{\mathbf{Z}}(\theta) d\theta.$$

Then by positivity, we also have

$$\mathbb{E} \left[ \left( \frac{\partial}{\partial \theta} \ln f_{\mathbf{Z}}(\theta) \right)^2 \middle| \mathbf{Z} \right] = \lim_{T \rightarrow +\infty} \int_{-T}^T f_{\mathbf{Z}}(\theta) \left( \frac{\partial}{\partial \theta} \ln f_{\mathbf{Z}}(\theta) \right)^2 d\theta.$$

If we focus the non-trivial case where the first limit is not  $-\infty$ , the above two equation implies the existence of the following limit.

$$\begin{aligned}
&\mathbb{E} \left[ \frac{\partial^2}{\partial \theta^2} \ln f_{\mathbf{Z}}(\theta) \middle| \mathbf{Z} \right] + \mathbb{E} \left[ \left( \frac{\partial}{\partial \theta} \ln f_{\mathbf{Z}}(\theta) \right)^2 \middle| \mathbf{Z} \right] \\
&= \lim_{T \rightarrow +\infty} \int_{-T}^T f_{\mathbf{Z}}(\theta) \left( \frac{\partial^2}{\partial \theta^2} \ln f_{\mathbf{Z}}(\theta) + \left( \frac{\partial}{\partial \theta} \ln f_{\mathbf{Z}}(\theta) \right)^2 \right) d\theta \\
&= \lim_{T \rightarrow +\infty} f_{\mathbf{Z}}(\theta) \frac{\partial}{\partial \theta} \ln f_{\mathbf{Z}}(\theta) \Big|_{\theta=-T}^{\theta=T} \\
&= \lim_{T \rightarrow +\infty} \frac{\partial}{\partial \theta} f_{\mathbf{Z}}(\theta) \Big|_{\theta=-T}^{\theta=T}.
\end{aligned}$$

The result of the above equation has to be zero, because the limit points of  $\frac{\partial}{\partial \theta} f_{\mathbf{Z}}(\theta)$  must contain zero on both ends of the real line, which is implied by the integrability of  $f_{\mathbf{Z}}$ . Consequently, we have

$$\mathbb{E} \left[ \left( \frac{\partial}{\partial \theta} \ln f_{\mathbf{Z}}(\theta) \right)^2 \middle| \mathbf{Z} \right] = \mathbb{E} \left[ -\frac{\partial^2}{\partial \theta^2} \ln f_{\mathbf{Z}}(\theta) \middle| \mathbf{Z} \right]. \quad (23)$$

Then, the special case of Proposition 3.3 with fixed  $\mathbf{Z}$  is implied by inequality (22).

When  $\mathbf{Z}$  is variable, we simply have

$$\begin{aligned}
\mathbb{E} [\text{Var}[\theta | \mathbf{Z}]] &\geq \mathbb{E} \left[ 1 / \mathbb{E} \left[ \left( \frac{\partial}{\partial \theta} \ln f_{\mathbf{Z}}(\theta) \right)^2 \middle| \mathbf{Z} \right] \right] \\
&\geq \frac{1}{\mathbb{E} \left[ \mathbb{E} \left[ \left( \frac{\partial}{\partial \theta} \ln f_{\mathbf{Z}}(\theta) \right)^2 \middle| \mathbf{Z} \right] \right]}.
\end{aligned}$$

Then the proposition is implied by equation (23).  $\square$

## C Proof of Theorem 2.2

We first investigate the lower bounds. Observe that the proof provided in Section 3.1 only fails when the constructed hard instances have  $\|\mathbf{x}_0\|_2 > 1$ . Hence, we have already covered the  $T \geq \left(\sum_{k=1}^d \lambda_k^{-\frac{1}{2}}\right) \left(\sum_{k=1}^d \lambda_k^{-\frac{3}{2}}\right)$  case, i.e., when  $k^* = \dim A = d$ . It remains to consider the other scenarios, where  $k^* < d$  is satisfied.

By the assumption that  $T \geq \left(\sum_{k=1}^{k^*} \lambda_k^{-\frac{1}{2}}\right) \left(\sum_{k=1}^{k^*} \lambda_k^{-\frac{3}{2}}\right)$ , one can instead set the entries of  $\mathbf{x}_0$  in the earlier proof with indices greater than  $k^*$  to be zero, so that  $\|\mathbf{x}_0\|_2 \leq 1$  is satisfied. Formally, let the hard-instance functions be constructed by the following set.

$$\mathbf{x}_0 \in \mathcal{X}_H \triangleq \left\{ (x_1, x_2, \dots, x_{k^*}, 0, \dots, 0) \mid x_k = \pm \sqrt{\frac{\lambda_k^{-\frac{3}{2}} \left(\sum_j \lambda_j^{-\frac{1}{2}}\right)}{2T}}, \forall k \in [k^*] \right\}.$$

Then by the identical proof steps, we have  $\mathfrak{R}(T; A) = \Omega\left(\left(\sum_{k=1}^{k^*} \lambda_k^{-\frac{1}{2}}\right)^2 / T\right)$ .

Next, we show that  $\mathfrak{R}(T; A) = \Omega(\lambda_{k^*+1})$ . We assume the non-trivial case where  $\lambda_{k^*+1} \neq 0$ . Note that  $\mathfrak{R}(T; A)$  is non-increasing w.r.t.  $T$ . We can lower bound  $\mathfrak{R}(T; A)$  through the above steps but by replacing  $T$  with any larger quantity. Specifically, recall that  $k^*$  is largest integer satisfying  $T \geq \left(\sum_{k=1}^{k^*} \lambda_k^{-\frac{1}{2}}\right) \left(\sum_{k=1}^{k^*} \lambda_k^{-\frac{3}{2}}\right)$ , which implies  $T \leq \left(\sum_{k=1}^{k^*+1} \lambda_k^{-\frac{1}{2}}\right) \left(\sum_{k=1}^{k^*+1} \lambda_k^{-\frac{3}{2}}\right)$ . We have,

$$\mathfrak{R}(T; A) \geq \mathfrak{R}\left(\left(\sum_{k=1}^{k^*+1} \lambda_k^{-\frac{1}{2}}\right) \left(\sum_{k=1}^{k^*+1} \lambda_k^{-\frac{3}{2}}\right); A\right).$$

Notice that this change of sampling time allows us to apply the earlier lower bound with  $k^*$  incremented by 1.

$$\begin{aligned} \mathfrak{R}(T; A) &\geq \Omega\left(\frac{\left(\sum_{k=1}^{k^*+1} \lambda_k^{-\frac{1}{2}}\right)^2}{\left(\sum_{k=1}^{k^*+1} \lambda_k^{-\frac{1}{2}}\right) \left(\sum_{k=1}^{k^*+1} \lambda_k^{-\frac{3}{2}}\right)}\right) \\ &= \Omega\left(\frac{\sum_{k=1}^{k^*+1} \lambda_k^{-\frac{1}{2}}}{\sum_{k=1}^{k^*+1} \lambda_k^{-\frac{3}{2}}}\right) = \Omega(\lambda_{k^*+1}). \end{aligned}$$

To conclude,

$$\mathfrak{R}(T; A) = \Omega\left(\max\left\{\frac{\left(\sum_{k=1}^{k^*} \lambda_k^{-\frac{1}{2}}\right)^2}{T}, \lambda_{k^*+1}\right\}\right) = \Omega\left(\frac{\left(\sum_{k=1}^{k^*} \lambda_k^{-\frac{1}{2}}\right)^2}{T} + \lambda_{k^*+1}\right),$$

which completes the proof of the lower bounds.

The needed upper bounds can be obtained by only estimating the first  $k^*$  entries of  $\mathbf{x}_0$ .

**Remark C.1.** *The requirement of  $T > 3 \dim A$  in the Theorem statement is simply due to the integer constraints for the achievability bounds. Indeed, when  $\lambda_{\dim A}$  is large, it requires at least  $\Omega(\dim A)$  samples to achieve  $O(1)$  expected simple regret.*

## D Proof Details for Theorem 2.4

### D.1 Truncation Method and Its Applications

The truncation method is based on the following facts.

**Proposition D.1.** For any sequence of independent random variables  $X_1, X_2, \dots, X_n$  and any fixed parameter  $m$  satisfying  $m > \max_k |\mathbb{E}[X_k]|$ . Let  $Z_k = \max\{\min\{X_k, m\}, -m\}$  for any  $k \in [n]$ , we have

$$|\mathbb{E}[Z_k] - \mathbb{E}[X_k]| \leq \frac{1}{4} \cdot \frac{\text{Var}[X_k]}{m - |\mathbb{E}[X_k]|}, \quad (24)$$

$$\text{Var}[Z_k] \leq \mathbb{E} \left[ (Z_k - \mathbb{E}[X_k])^2 \right] \leq \text{Var}[X_k]. \quad (25)$$

Moreover, for any  $z > 0$ , we have

$$\mathbb{P} \left[ \left| \sum_k Z_k - \sum_k \mathbb{E}[X_k] \right| \geq z \right] \leq 2 \exp \left( \sum_k \frac{\text{Var}[X_k]}{m(m - |\mathbb{E}[X_k]|)} - \frac{z}{m} \right). \quad (26)$$

*Proof.* The first inequality is proved by expressing the LHS with piecewise linear functions. Note that by the definition of  $Z_k$ , we have

$$\begin{aligned} |\mathbb{E}[Z_k] - \mathbb{E}[X_k]| &= |\mathbb{E}[\max\{-m - X_k, 0\}] - \mathbb{E}[\max\{X_k - m, 0\}]| \\ &\leq |\mathbb{E}[\max\{-m - X_k, 0\}]| + |\mathbb{E}[\max\{X_k - m, 0\}]| \\ &= \mathbb{E}[\max\{|X_k| - m, 0\}]. \end{aligned}$$

We apply the following inequalities, which holds for any  $m \geq |\mathbb{E}[X_k]|$ .

$$|X_k| - m \leq |X_k - \mathbb{E}[X_k]| - m + \mathbb{E}[X_k] \leq \frac{1}{4} \cdot \frac{|X_k - \mathbb{E}[X_k]|^2}{m - \mathbb{E}[X_k]}.$$

Therefore,

$$\begin{aligned} |\mathbb{E}[Z_k] - \mathbb{E}[X_k]| &\leq \mathbb{E} \left[ \frac{1}{4} \cdot \frac{|X_k - \mathbb{E}[X_k]|^2}{m - \mathbb{E}[X_k]} \right] \\ &= \frac{1}{4} \cdot \frac{\text{Var}[X_k]}{m - |\mathbb{E}[X_k]|}. \end{aligned}$$

The second inequality is due to the following elementary facts,

$$\mathbb{E}[(Z_k - \mathbb{E}[X_k])^2] \leq \mathbb{E}[(X_k - \mathbb{E}[X_k])^2] = \text{Var}[X_k],$$

where the inequality step is implied by the definition of  $Z_k$  and the condition  $m > \max_k |\mathbb{E}[X_k]|$ .

To prove the third inequality, we first investigate the following upper bound, which is due to Markov's inequality.

$$\begin{aligned} \mathbb{P} \left[ \sum_k Z_k - \sum_k \mathbb{E}[X_k] \geq z \right] &\leq \frac{\mathbb{E}[e^{\frac{1}{m}(\sum_k Z_k - \sum_k \mathbb{E}[X_k])}]}{e^{\frac{z}{m}}} \\ &= \frac{\prod_k \mathbb{E}[e^{\frac{1}{m}(Z_k - \mathbb{E}[X_k])}]}{e^{\frac{z}{m}}} \end{aligned} \quad (27)$$

The equality step above is by the fact that  $Z_k$ 's are jointly independent. For each  $k$ , using the fact that  $Z_k$  is bounded, particularly,  $Z_k - \mathbb{E}[X_k] \leq m + |\mathbb{E}[X_k]|$ , we have the following inequality

$$e^{\frac{1}{m}(Z_k - \mathbb{E}[X_k])} - 1 - \frac{1}{m}(Z_k - \mathbb{E}[X_k]) \leq (Z_k - \mathbb{E}[X_k])^2 \cdot \frac{e^{\frac{1}{m}(m + |\mathbb{E}[X_k]|)} - 1 - \frac{1}{m}(m + |\mathbb{E}[X_k]|)}{(m + |\mathbb{E}[X_k]|)^2}.$$

For brevity, let  $\theta \triangleq \frac{|\mathbb{E}[X_k]|}{m}$ . We combine the above bound with inequality (24) and (25) to obtain that

$$\begin{aligned} \mathbb{E}[e^{\frac{1}{m}(Z_k - \mathbb{E}[X_k])}] &= 1 + \mathbb{E} \left[ \frac{1}{m}(Z_k - \mathbb{E}[X_k]) \right] + \mathbb{E} \left[ e^{\frac{1}{m}(Z_k - \mathbb{E}[X_k])} - 1 - \frac{1}{m}(Z_k - \mathbb{E}[X_k]) \right] \\ &\leq 1 + \frac{\text{Var}[X_k]}{m(m - |\mathbb{E}[X_k]|)} \cdot \left( \frac{1}{4} + (1 - \theta) \cdot \frac{e^{1+\theta} - 2 - \theta}{(1 + \theta)^2} \right). \end{aligned} \quad (28)$$

Recall that  $\theta < 1$  as assumed in the proposition. From elementary calculus, we have

$$\begin{aligned}\mathbb{E}[e^{\frac{1}{m}(Z_k - \mathbb{E}[X_k])}] &\leq 1 + \frac{\text{Var}[X_k]}{m(m - |\mathbb{E}[X_k]|)} \\ &\leq \exp\left(\frac{\text{Var}[X_k]}{m(m - |\mathbb{E}[X_k]|)}\right).\end{aligned}$$

Therefore, recall inequality (27), we have

$$\mathbb{P}\left[\sum_k Z_k - \sum_k \mathbb{E}[X_k] \geq z\right] \leq \exp\left(\sum_k \frac{\text{Var}[X_k]}{m(m - |\mathbb{E}[X_k]|)} - \frac{z}{m}\right).$$

By symmetry, one can also prove the following bound through the same steps.

$$\mathbb{P}\left[\sum_k Z_k - \sum_k \mathbb{E}[X_k] \leq -z\right] \leq \exp\left(\sum_k \frac{\text{Var}[X_k]}{m(m - |\mathbb{E}[X_k]|)} - \frac{z}{m}\right).$$

Hence, the needed inequality is obtained by adding the two inequalities above.  $\square$

Now equation (14) for the 1D case is immediately implied by Proposition D.1. Recall the construction of  $\hat{A}$  in the proof, for any sufficiently large  $T_0$ , we have

$$\mathbb{P}\left[|\hat{A} - A| \geq T_0^{-\alpha}\right] \leq 2 \exp\left(3 - \frac{T_0^{0.5-\alpha}}{3}\right) = o\left(\frac{1}{T_0^\beta}\right).$$

**Remark D.2.** *Instead of projecting to a bounded interval, the same achievability result can be obtained if we average over any functions that map the samples to  $[-T_0^{0.5}, T_0^{0.5}]$  while imposing an additional error of  $o(T^{-\alpha})$  everywhere. This includes  $\Theta(\ln T)$ -bit uniform quantizers, which naturally appear in digital systems, over which exact computation can be performed to eliminate numerical errors. We present this simple generalization in the following corollary.*

**Corollary D.3.** *Consider the setting in Proposition D.1. Let  $Y_1, \dots, Y_n$  be variables that satisfy  $|Y_k - Z_k| \leq b$  for all  $k$  with probability 1. We have*

$$\mathbb{P}\left[\left|\sum_k Y_k - \sum_k \mathbb{E}[X_k]\right| \geq z\right] \leq 2 \exp\left(\sum_k \frac{\text{Var}[X_k]}{m(m - |\mathbb{E}[X_k]|)} - \frac{z - bn}{m}\right).$$

## D.2 Proof of Proposition 4.2

*Proof.*

$$\mathbf{y}^\top Z \mathbf{y} - \mathbf{y}^\top \hat{A}_0 \mathbf{y} = \mathbf{y}^\top (Z - \hat{A}_0) \mathbf{y} \leq \|Z - \hat{A}_0\|_{\text{F}} \|\mathbf{y}\|_2^2 \leq \|Z - \hat{A}_0\|_{\text{F}} \|\hat{A}_0^{-1}\|_{\text{F}} (\mathbf{y}^\top \hat{A}_0 \mathbf{y}).$$

$\square$

## D.3 Proof of inequality (19)

We apply Proposition 4.2 to inequality (17) and let  $Z = A \hat{A}_0^{-1} A$ . Note that

$$\|Z - \hat{A}_0\|_{\text{F}} \leq 2\|A - \hat{A}_0\|_{\text{F}} + \|(A - \hat{A}_0) \hat{A}_0^{-1} (A - \hat{A}_0)\|_{\text{F}} = o(1),$$

which satisfies the condition of Proposition 4.2. Using the fact that  $\hat{A}_0^{-1} \hat{A}_0 \hat{A}_0^{-1} = \hat{A}_0^{-1}$ , we have

$$\begin{aligned}&\mathbb{E}\left[\left(\hat{A}_0^{-1} A (\hat{\mathbf{x}} - \hat{A}_0^{-1} A \mathbf{x}_0)\right)^\top \hat{A}_0 \left(\hat{A}_0^{-1} A (\hat{\mathbf{x}} - \hat{A}_0^{-1} A \mathbf{x}_0)\right)\right] \\ &= \mathbb{E}\left[\left(\hat{\mathbf{x}} - \hat{A}_0^{-1} A \mathbf{x}_0\right)^\top Z \left(\hat{\mathbf{x}} - \hat{A}_0^{-1} A \mathbf{x}_0\right)\right] = O\left(\left(\text{Tr}(A^{-\frac{1}{2}})\right)^2\right) / T.\end{aligned}\quad (29)$$

Then by the triangle inequality for the PSD matrix  $\hat{A}_0$ , the combination of the above inequality and inequality (18) gives

$$\mathbb{E}\left[\left(\tilde{\mathbf{x}}_T - \mathbf{z}\right)^\top \hat{A}_0 \left(\tilde{\mathbf{x}}_T - \mathbf{z}\right)\right] = O\left(\left(\text{Tr}(A^{-\frac{1}{2}})\right)^2\right) / T.$$

#### D.4 Proof of Proposition 4.3

*Proof.* When  $A_1$  and  $A$  has the same rank, the map  $P_1$  is invertible over the column space of  $A$ . Under such condition, there exists a matrix  $X$  such that  $A = XP_1A$ . Note that  $A_1A_1^{-1} = P_1$ . We have  $XP_1 = XP_1A_1A_1^{-1} = AA_1^{-1}$ . Therefore, the needed  $A = AA_1^{-1}A$  is obtained by multiplying  $A$  on the right-hand sides in the above identity.  $\square$
